# Supplementary material
Source: publisher figshare collection journal article supplement (https://acs.figshare.com/ndownloader/files/5011768)
Supplement: Supplementary file 1 [file 5011768]

# Supporting Information

## Two-dimensional Halide Perovskites: Tuning Electronic Activities of Defects

Yuanyue Liu,<sup>\*1,2</sup> Hai Xiao<sup>1</sup> and William A. Goddard III<sup>\*1</sup>

<sup>1</sup>*Materials and Process Simulation Center*

<sup>2</sup>*the Resnick Sustainability Institute*

*California Institute of Technology, Pasadena, CA 91125, USA*

\*Correspondence to: [yuanyue@caltech.edu](mailto:yuanyue@caltech.edu) and [wag@wag.caltech.edu](mailto:wag@wag.caltech.edu)

The line defects are modelled by a ribbon with width of  $\sim 3$  nm (for edges) or 6 nm (for grain boundaries). For point defects in 2D  $\text{Rb}_2\text{PbI}_4$ , we use a  $4 \times 4$  supercell (see the structure of the primitive cell in Fig. 1). For point defects in 2D  $\text{MA}_2\text{SnBr}_4$ , we use a  $3 \times 3$  supercell to reduce the computational cost to an affordable limit.

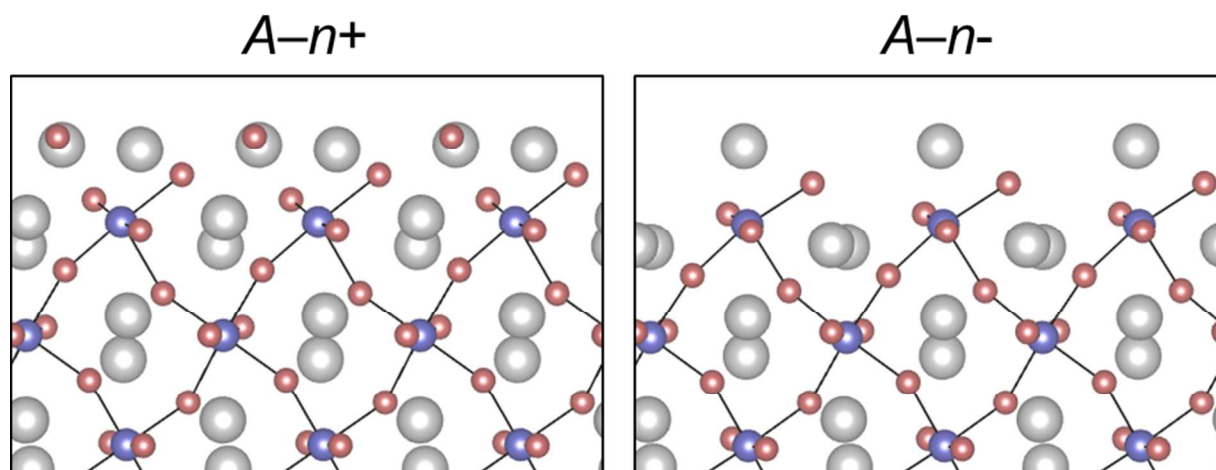

**Fig. S1.** Edges along  $A$  direction with surplus cations/deficient anions.  $A-n+$  can be thought as adding more Rb into  $A-N+$  (Fig. 2), and  $A-n-$  can be thought as removing I from  $A-N+$ , or adding more Rb into  $A-N-$  (Fig. 2).

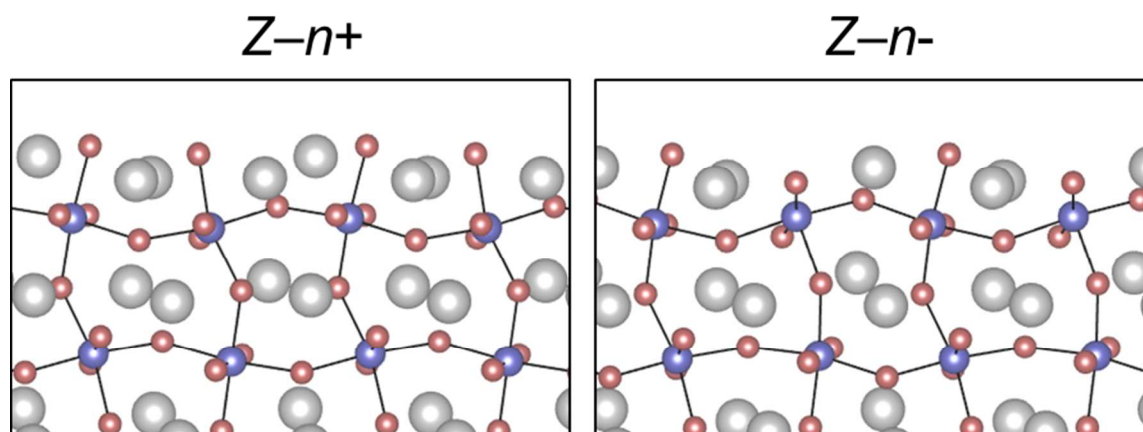

**Fig. S2.** Edges along  $Z$  direction with surplus cations/deficient anions.  $Z-n+$  can be thought as adding more Rb into  $Z-N+$  (Fig. 2), and  $Z-n-$  can be thought as removing I from  $Z-N+$ , or adding more Rb into  $Z-N-$  (Fig. 2).

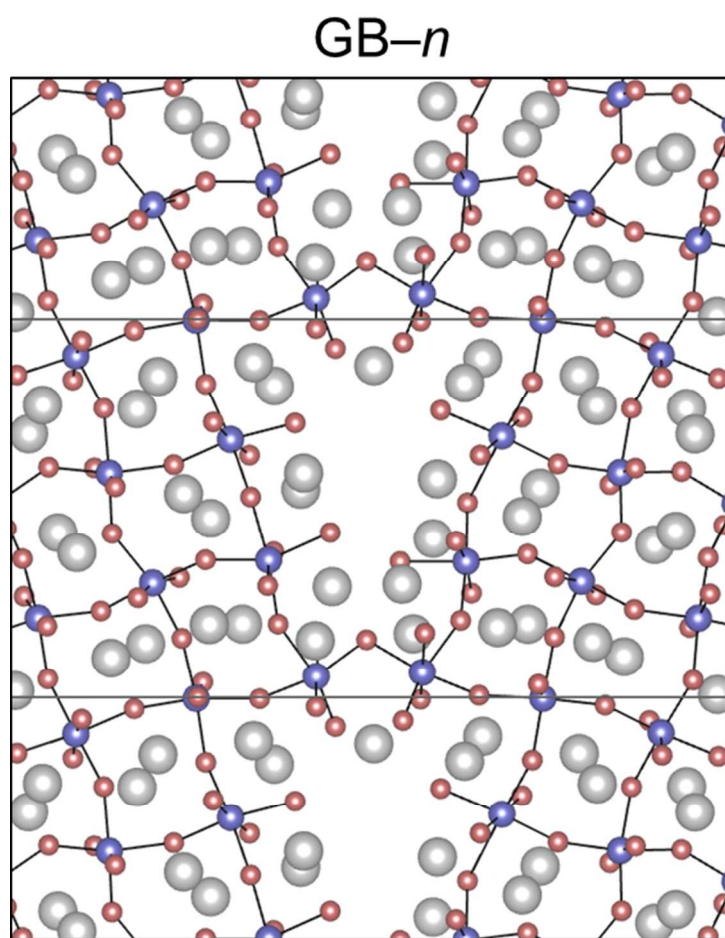

**Fig. S3.** Structure of grain boundary with surplus cations. This can be thought as adding more Rb into  $GB-N$  (Fig. 3).

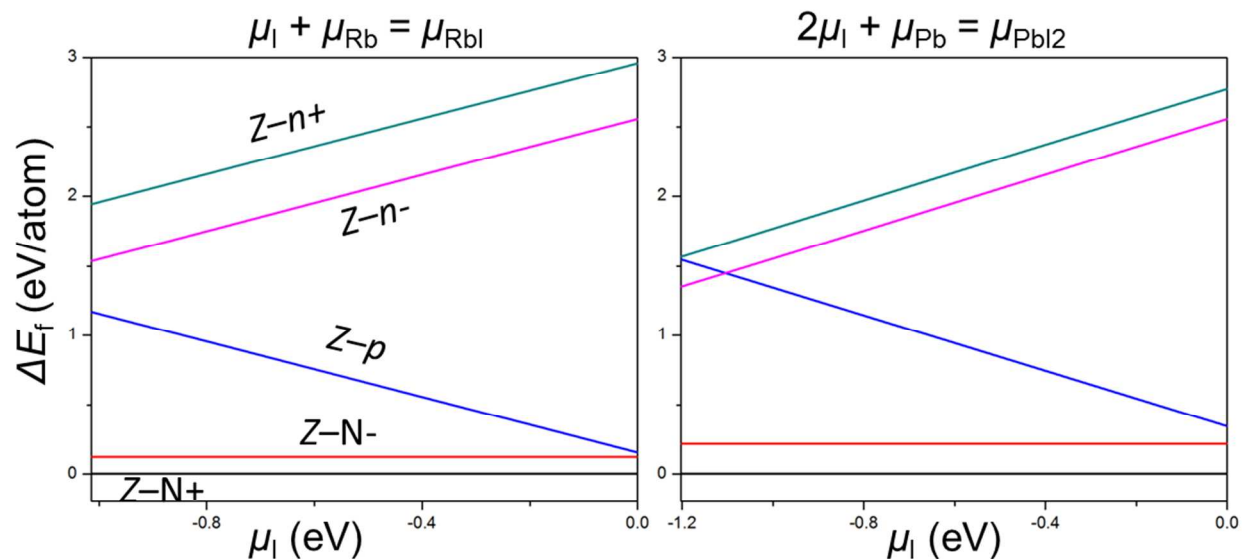

**Fig. S4.** Energies of various edges along Z direction, with respect to that of Z-N+, as a function of I chemical potential (with respect to that of I<sub>2</sub> molecule) along phase boundaries.

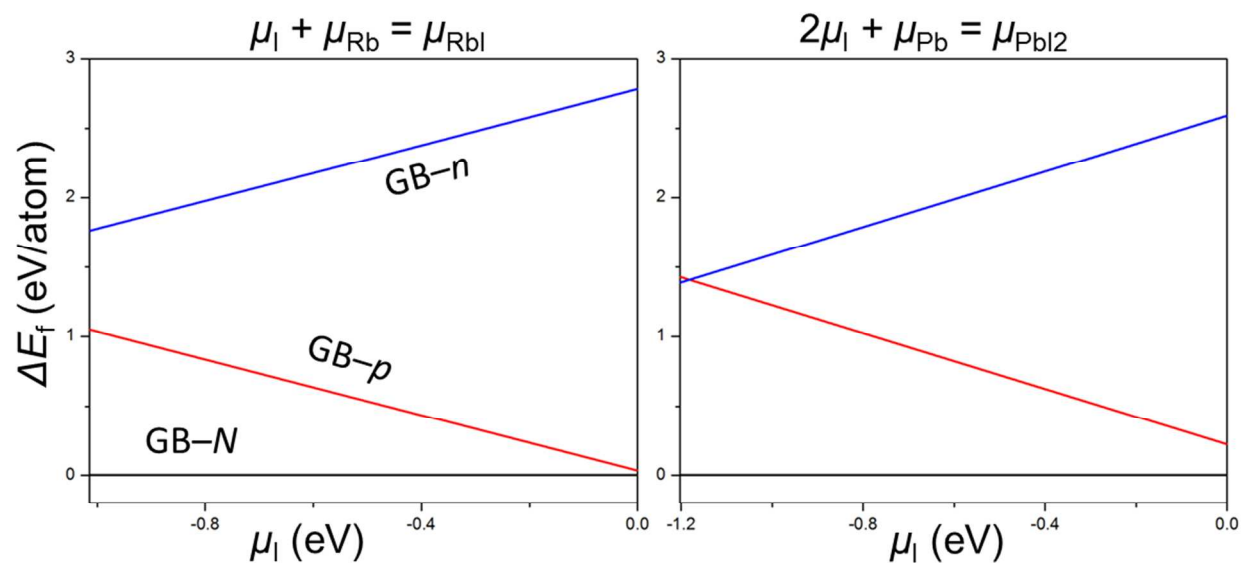

**Fig. S5.** Energies of various grain boundaries, with respect to that of GB-N, as a function of I chemical potential (with respect to that of I<sub>2</sub> molecule) along phase boundaries.

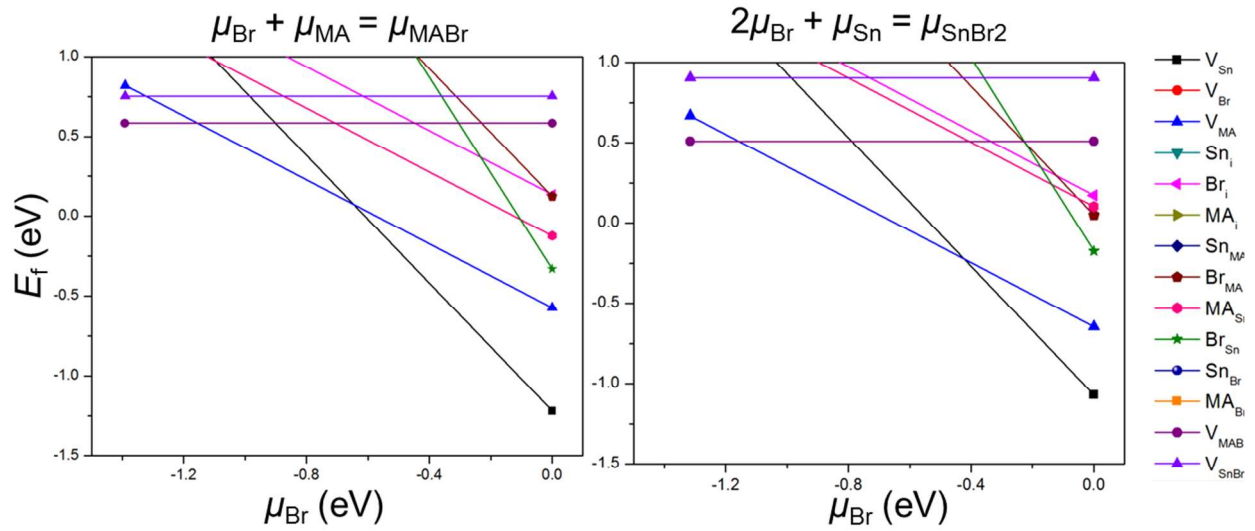

**Fig. S6.** Energies of various point defects in 2D  $\text{MA}_2\text{SnBr}_4$  ( $\text{MA} = \text{CH}_3\text{NH}_3$ ), as a function of Br chemical potential (with respect to that of  $\text{Br}_2$  molecule) along phase boundaries. These suggest that the formation of harmful defects can be suppressed by decreasing the chemical potential of Br, in consistence with  $\text{Rb}_2\text{PbI}_4$ .
